# Supplementary material for: Realizing semiconductor–half-metal transition in zigzag graphene nanoribbons supported on hybrid fluorographene–graphane nanoribbons
Source: Royal Society of Chemistry journal article supplement (doi:10.1039/c4cp03291h), 2014-09-10
Supplement: c4cp03291h1.pdf [file c4cp03291h1.pdf]

## Supporting Information

Realizing Semiconductor – Half-Metal Transition in Zigzag  
Graphene Nanoribbons Supported on Hybrid Fluorographene-  
Graphane Nanoribbons

Shaobin Tang<sup>1,\*</sup> and Xinrui Cao<sup>2</sup>

<sup>1</sup>*Key Laboratory of Organo-Pharmaceutical Chemistry of Jiangxi Province, Gannan Normal University, Ganzhou 341000, China*

<sup>2</sup>*Department of Theoretical Chemistry and Biology, School of Biotechnology, Royal Institute of Technology, S-106 91 Stockholm, Sweden*

\* *E-mail address:* [tsb1980@xmu.edu.cn](mailto:tsb1980@xmu.edu.cn)

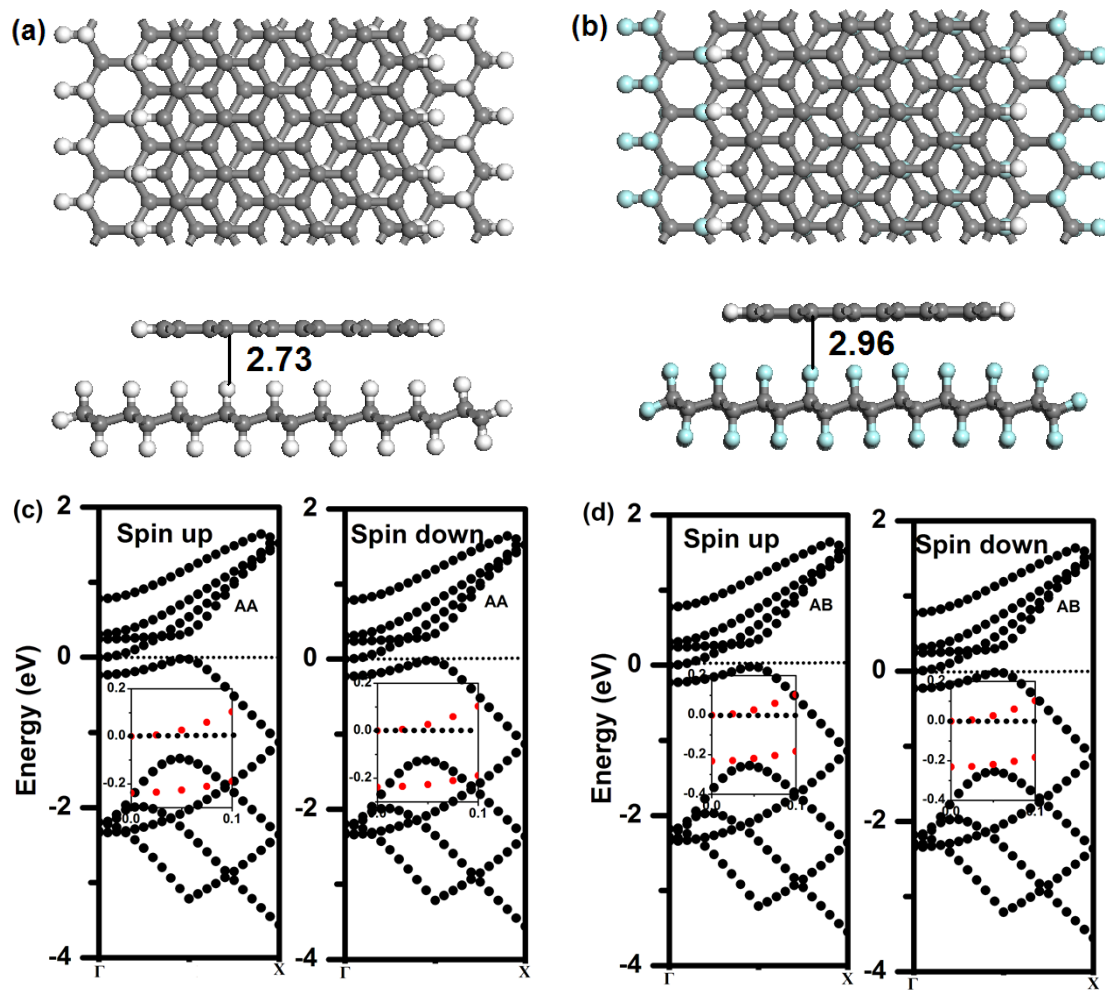

**Figure S1.** Top and side views of geometric structures of (a) 6-ZGNR/9H-G and (b) 6-ZGNR/9F-G in AB stacking pattern. Spin-polarized band structures of 6-ZGNR/9F-G in (c) AA and (d) AB stacking. The Fermi level is set to zero. The insert in (c) and (d) shows the bands near the Fermi level.

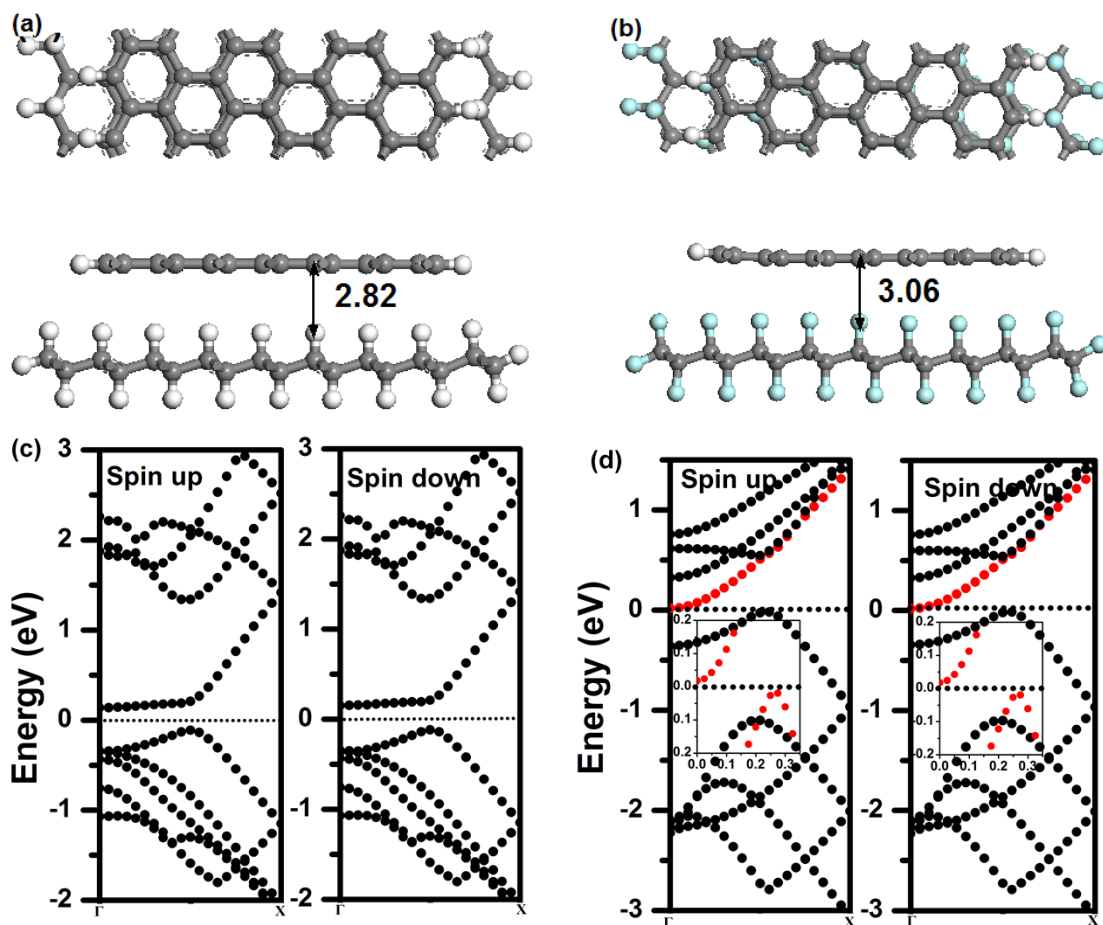

**Figure S2.** Top and side views of geometric structures (a, b) and spin-polarized band structures (c, d) by PBE with vdW correction. (a) and (c) 9-ZGNR/9H-G, and (b) and (d) 9-ZGNR/9F-G. The interlayer distances in (a) and (b) are in Å. The Fermi level is set to zero, and the insert in (d) shows the bands near the Fermi level.

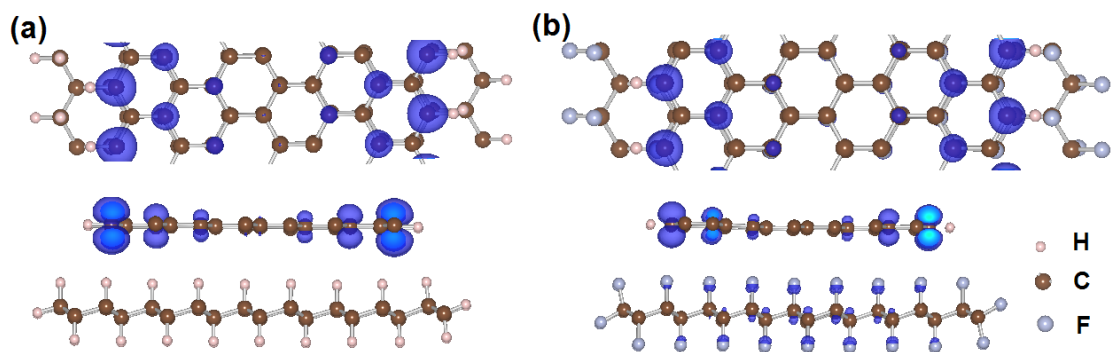

**Figure S3.** The partial charge densities of (a) 7-ZGNR/9H-G and (b) 7-ZGNR/9F-G in AFM state within energy range  $|E - E_f| \leq 0.2$  eV. The isosurface is  $0.002 e/\text{\AA}^3$ .

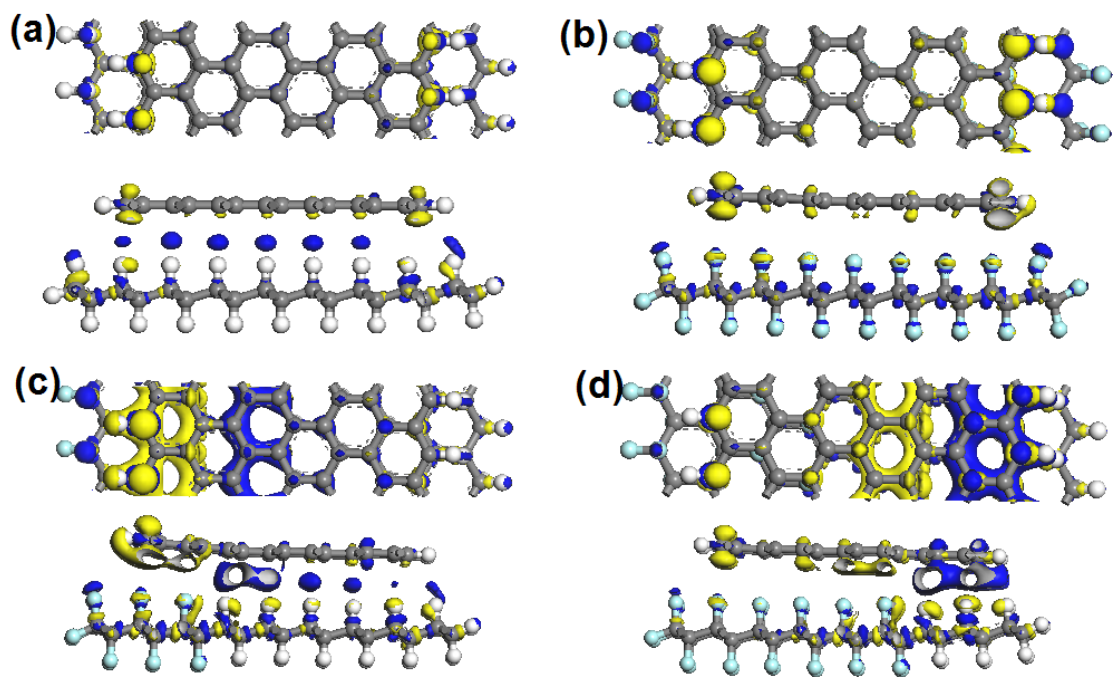

**Figure S4.** Charge density difference of (a) 7-ZGNR/9H-G, (b) 7-ZGNR/9F-G, (c) 7-ZGNR/6H-3F-G, and (d) 7-ZGNR/3H-6F-G. The blue and yellow areas denote electron accumulation and depletion, respectively, and isosurfaces are  $0.002 e/\text{\AA}^3$ .

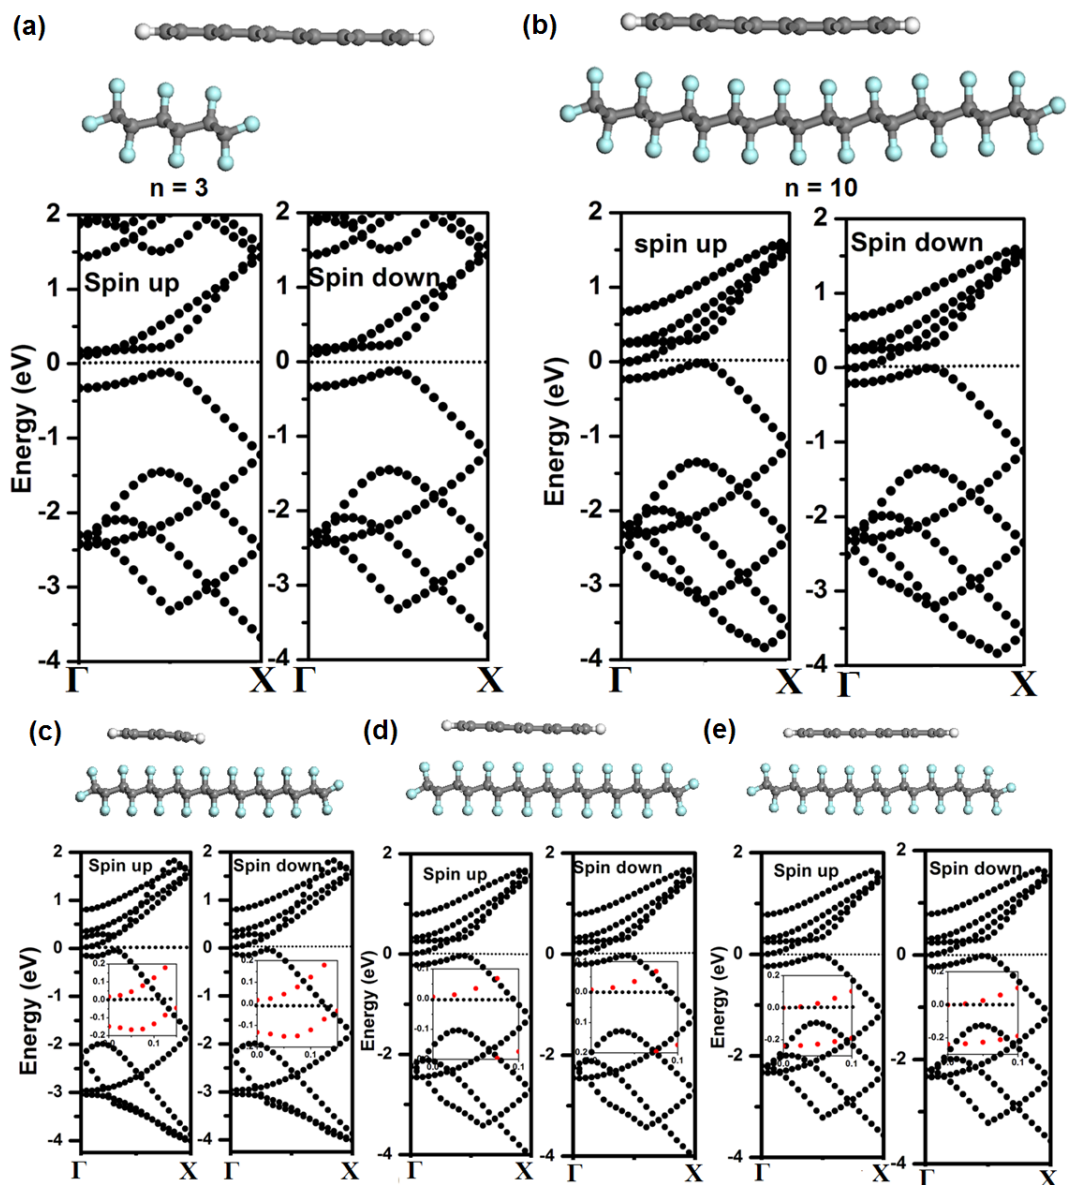

**Figure S5.** Side view of geometric structures (top panel) and band structures (bottom panel) of (a) 6-ZGNR/3F-G, (b) 6-ZGNR/10F-G, (c) 3-ZGNR/9F-G, (d) 5-ZGNR/9F-G, and (e) 6-ZGNR/9F-G. The Fermi level is set to 0.

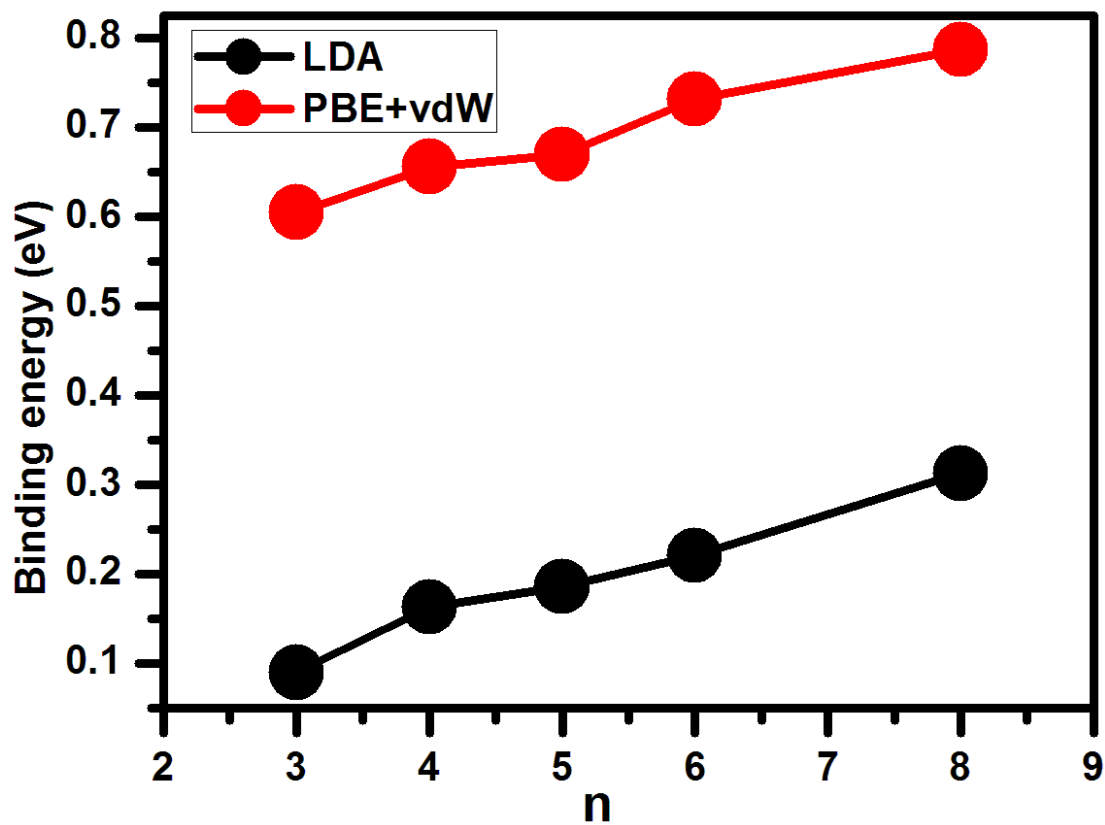

**Figure S6.** The binding energy of 6-ZGNR/nF-G as a function of the number of fluorinated zigzag chains  $n$  in support by both LDA and PBE+vdW.

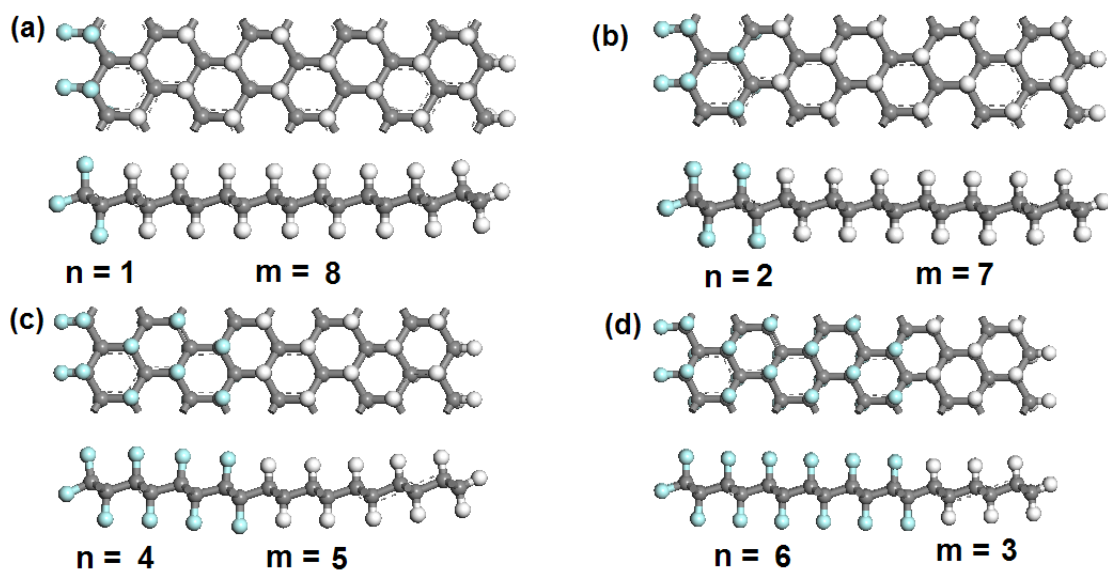

**Figure S7.** Top and side views of geometric structures of (9- $n$ )H- $n$ F-G with  $n =$  (a) 1, (b) 2, (c) 4, and (d) 6.

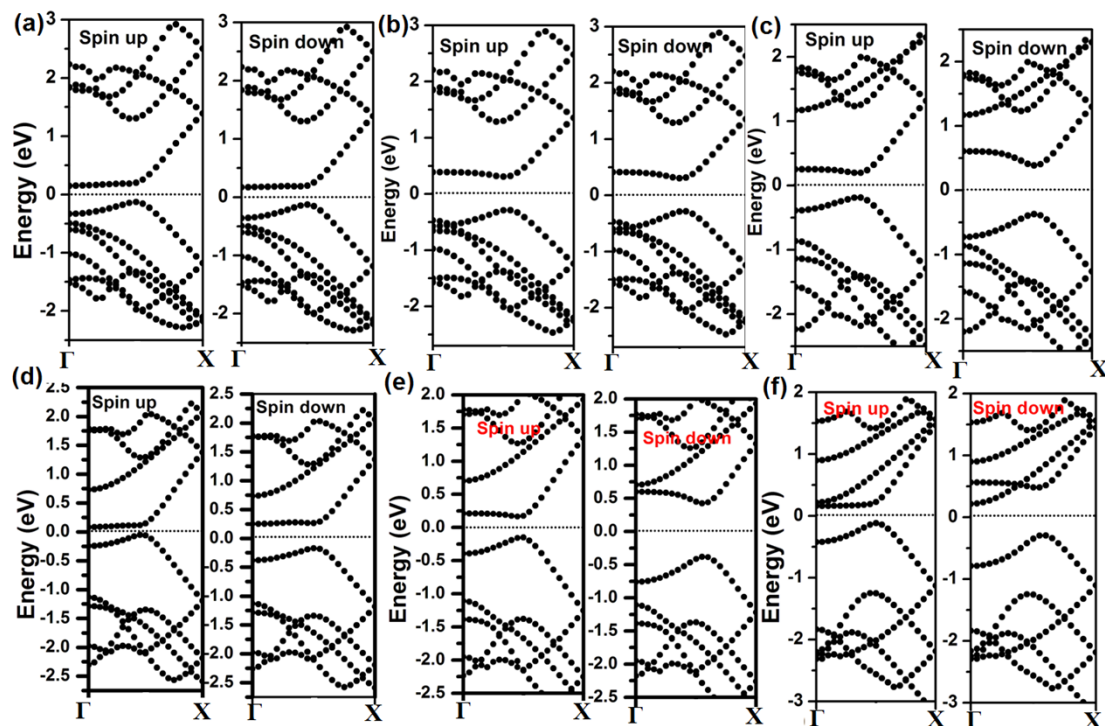

**Figure S8.** Spin-polarized band structures of 7-ZGNR/(9- $n$ )H- $n$ F-G by (a, d) LSDA and (b, c, e, and f) PBE+D. (a) and (b)  $n = 1$ , (c)  $n = 3$ , (d) and (e)  $n = 4$ , and (f)  $n = 6$ . The Fermi level is set to zero.

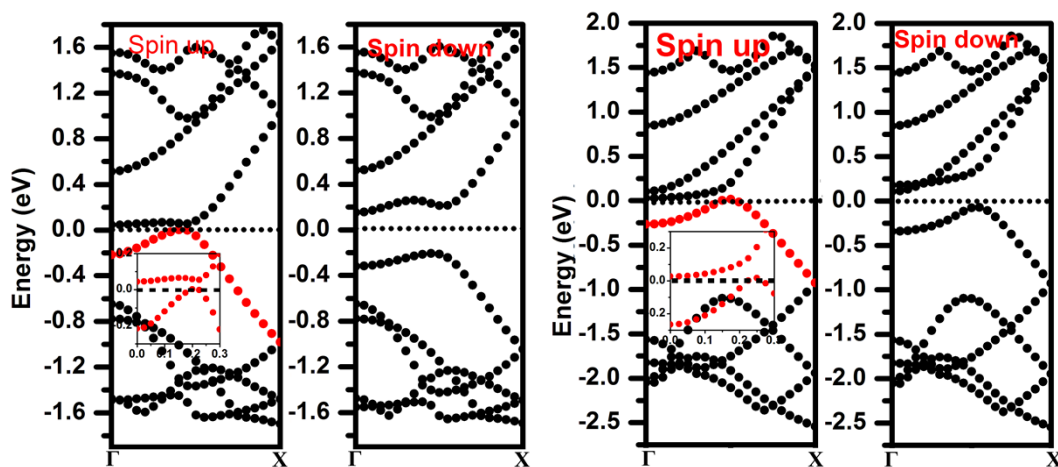

**Figure S9.** Spin-polarized band structures of 7-ZGNR/6H-3F-G and 7-ZGNR/3H-6F-G with interlayer spacing of 1.65 and 2.21 Å, respectively. The Fermi level is set to 0.

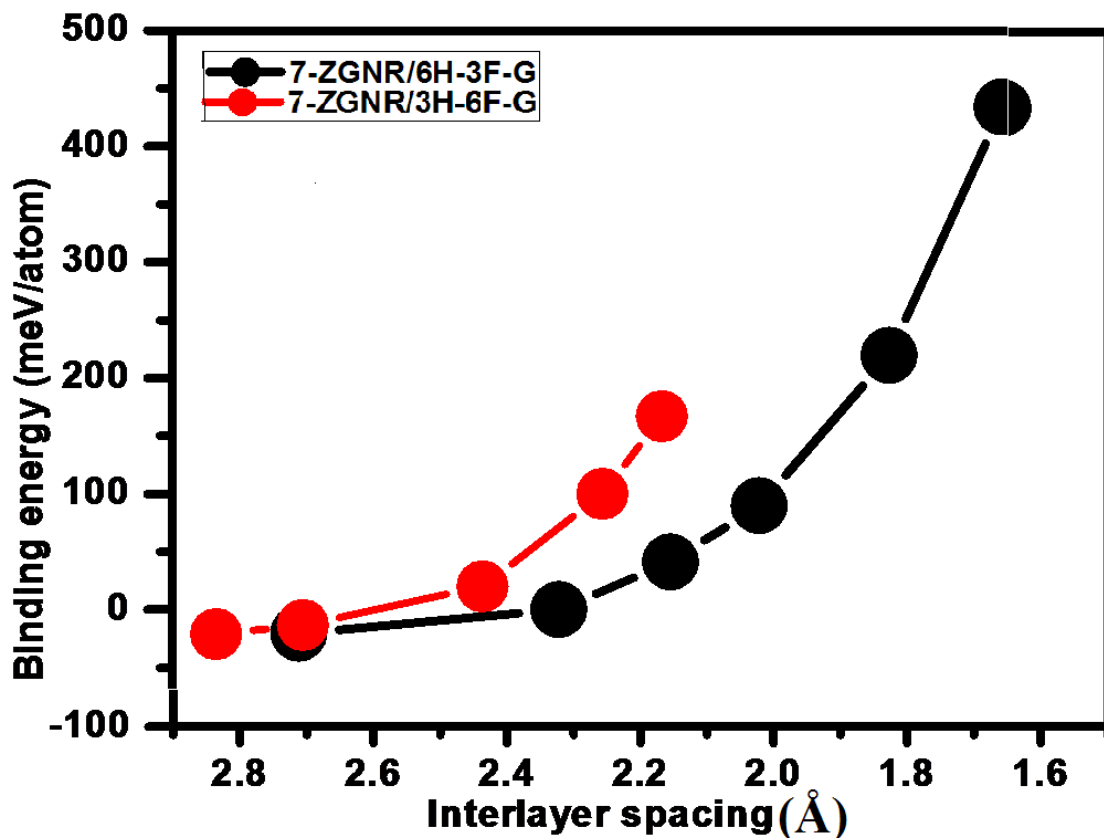

**Figure S10.** The binding energy of 7-ZGNR/6H-3F-G and 3H-6F-G as a function of the interlayer spacing.
